# Supplementary material for: The Cenozoic Multiple-Stage Uplift of the Qiangtang Terrane, Tibetan Plateau
Source: Frontiers journal article supplement (doi:10.3389/feart.2022.818079), 2022-06-17
Supplement: Table_2.XLSX [file Table_2.XLSX]

## Sheet: Collected and our new data
References		Sample number	Latitude	Longitude	Age (Ma)	Error (Ma)	Methods	Age of protolith
Lu et al	2015	B07-1	31.9891	91.7604	81	9	AFT	Cam-Ordovican schist
Lu et al	2015	B11	32.0376	91.6806	77	7	AFT	Cam-Ordovican
Lu et al	2015	B15	32.036	91.6124	86	5	AFT	Jurassic granite
Lu et al	2015	B20	32.0836	91.5669	89	6	AFT	andesite
Lu et al	2015	B31-1	32.1219	91.7073	108	7	AFT	Cam-Ordovican
Lu et al	2015	B37	32.2509	91.6781	60	11	AFT	andesite
Lu et al	2015	B47-1	32.2969	92.155	36	4	AFT	Triassic strata
Lu et al	2015	B61	31.8324	91.8381	43	3	AFT	Cam-Ordovican
Lu et al	2015	B62	31.8246	91.8525	69	5	AFT	Cam-Ordovican
Lu et al	2015	B65	31.8069	91.7776	70	4	AFT	Cam-Ordovican
Lu et al	2015	B72	31.8846	91.6997	97	7	AFT	Cam-Ordovican
Lu et al	2015	B86	31.8798	91.0758	72	5	AFT	Jurassic granite
Lu et al	2015	B87	31.9662	92.1681	77	5	AFT	Jurassic granite
Lu et al	2015	B88	32.0024	92.191	85	5	AFT	Jurassic granite
Lu et al	2015	B93	32.0469	92.1941	75	5	AFT	Jurassic granite
Lu et al	2015	B96	32.1619	92.0214	93	6	AFT	Jurassic granite
Lu et al	2015	B131	32.2115	92.5126	57	5	AFT	Triassic strata
Lu et al	2015	B177	32.291	92.1563	87	6	AFT	Triassic strata
Lu et al	2015	B5239	32.0389	91.6908	55	4	AFT	Cam-Ordovican
Lu et al	2015	B52310	31.8294	91.7417	46	4	AFT	Cam-Ordovican
Lu et al	2015	B11	32.0376	91.6806	96	4	ZFT	Cam-Ordovican
Lu et al	2015	B15	32.036	91.6124	94	4	ZFT	Jurassic granite
Lu et al	2015	B20	32.0836	91.5669	126	9	ZFT	andesite
Lu et al	2015	B31-1	32.1219	91.7073	117	6	ZFT	Cam-Ordovican
Lu et al	2015	B47-1	32.2969	92.155	103	5	ZFT	Triassic strata
Lu et al	2015	B62	31.8246	91.8525	99	4	ZFT	Cam-Ordovican
Lu et al	2015	B65	31.8069	91.7776	107	7	ZFT	Cam-Ordovican
Lu et al	2015	B72	31.8846	91.6997	108	5	ZFT	Cam-Ordovican
Lu et al	2015	B86	31.8798	91.0758	78	4	ZFT	Jurassic granite
Lu et al	2015	B87	31.9662	92.1681	94	4	ZFT	Jurassic granite
Lu et al	2015	B88	32.0024	92.191	91	5	ZFT	Jurassic granite
Lu et al	2015	B93	32.0469	92.1941	93	5	ZFT	Jurassic granite
Lu et al	2015	B96	32.1619	92.0214	112	5	ZFT	Jurassic granite
Lu et al	2015	B131	32.2115	92.5126	107	5	ZFT	Jurassic granite
Lu et al	2015	B177	32.291	92.1563	104	5	ZFT	Triassic strata
Wang and Wei	2013	SD029FT	32.8191	88.7658	117	8	AFT	J2 Xiali Fm.
Wang and Wei	2013	SD023FT2	32.8191	88.7658	63	4	AFT	J2 Xiali Fm.
Wang and Wei	2013	SD037FT2	32.8191	88.7658	130	9	AFT	J2 Xiali Fm.
Wang and Wei	2013	SD003FT1	32.8191	88.7658	83	6	AFT	J2 Xiali Fm.
Wang and Wei	2013	SD023FT1	32.8191	88.7658	88	5	AFT	J2 Xiali Fm.
Wang and Wei	2013	SD037FT3	32.8191	88.7658	160	11	AFT	J2 Xiali Fm.
Wang and Wei	2013	FT02-1	33.3368	89.1967	110.9	8.6	AFT	J3-K1 Xueshuihe Fm.
Wang and Wei	2013	FT02-4	33.3368	89.1967	117.3	8.5	AFT	J3-K1 Xueshuihe Fm.
Wang and Wei	2013	FT23-3	33.3368	89.1967	83.8	9.9	AFT	J3-K1 Xueshuihe Fm.
Wang and Wei	2013	FT23-5	33.3368	89.1967	89.5	8.6	AFT	J3-K1 Xueshuihe Fm.
Dai et al	2013	D27-1	31.9658	92.1678	64.12	1.4	Ahe	129Ma granite
Dai et al	2013	D27-2	31.9658	92.1678	69.02	1.95	Ahe	129Ma granite
Dai et al	2013	D27-3	31.9658	92.1678	60.59	1.19	Ahe	129Ma granite
Dai et al	2013	D27-4	31.9658	92.1678	67.68	1.64	Ahe	129Ma granite
Dai et al	2013	D27-5	31.9658	92.1678	74.11	1.68	Ahe	129Ma granite
Dai et al	2013	D28-1	31.7847	92.0669	54.59	1.16	Ahe	110Ma granite
Dai et al	2013	D28-2	31.7847	92.0669	71.22	1.3	Ahe	110Ma granite
Dai et al	2013	D28-3	31.7847	92.0669	63.94	1.58	Ahe	110Ma granite
Dai et al	2013	D28-4	31.7847	92.0669	57.99	1.23	Ahe	110Ma granite
Dai et al	2013	D28-5	31.7847	92.0669	78.72	1.81	Ahe	110Ma granite
Dai et al	2013	D30-1	31.7378	92.6819	31.87	0.67	Ahe	112Ma granite
Dai et al	2013	D30-2	31.7378	92.6819	47.06	1.03	Ahe	112Ma granite
Dai et al	2013	D30-3	31.7378	92.6819	49.39	1.23	Ahe	112Ma granite
Dai et al	2013	D30-4	31.7378	92.6819	39.05	0.9	Ahe	112Ma granite
Dai et al	2013	D30-5	31.7378	92.6819	30.64	0.58	Ahe	112Ma granite
Dai et al	2013	D32-1	31.8325	93.5553	15.28	0.28	Ahe	113Ma granite
Dai et al	2013	D32-2	31.8325	93.5553	28.28	0.55	Ahe	113Ma granite
Dai et al	2013	D32-3	31.8325	93.5553	26.6	0.56	Ahe	113Ma granite
Dai et al	2013	D32-4	31.8325	93.5553	15	0.3	Ahe	113Ma granite
Dai et al	2013	D32-5	31.8325	93.5553	14.62	0.28	Ahe	113Ma granite
Dai et al	2013	D56-1	33.7928	96.7975	70.87	1.35	Ahe	211Ma granite
Dai et al	2013	D56-2	33.7928	96.7975	52.5	1.08	Ahe	211Ma granite
Dai et al	2013	D56-3	33.7928	96.7975	68.32	1.4	Ahe	211Ma granite
Dai et al	2013	D56-4	33.7928	96.7975	66.97	1.49	Ahe	211Ma granite
Dai et al	2013	D56-5	33.7928	96.7975	108.44	2.04	Ahe	211Ma granite
Dai et al	2013	D55-1	33.1617	97.3656	49.68	0.95	Ahe	Triassic sandstone
Dai et al	2013	D55-2	33.1617	97.3656	64.87	1.35	Ahe	Triassic sandstone
Dai et al	2013	D58-1	35.0525	98.6539	64.53	2.65	Ahe	Triassic sandstone
Dai et al	2013	D58-2	35.0525	98.6539	119.88	6.28	Ahe	Triassic sandstone
Dai et al	2013	D58-3	35.0525	98.6539	55.04	2.64	Ahe	Triassic sandstone
Dai et al	2013	D58-4	35.0525	98.6539	82.88	1.78	Ahe	Triassic sandstone
Dai et al	2013	D58-5	35.0525	98.6539	118.76	5.04	Ahe	Triassic sandstone
Dai et al	2013	D58-6	35.0525	98.6539	79.64	1.65	Ahe	Triassic sandstone
Dai et al	2013	D57-1	34.1389	97.675	92.13	2.54	Ahe	Triassic sandstone
Dai et al	2013	D57-2	34.1389	97.675	62.13	1.85	Ahe	Triassic sandstone
Dai et al	2013	D57-3	34.1389	97.675	91.18	1.81	Ahe	Triassic sandstone
Dai et al	2013	D57-4	34.1389	97.675	89.72	1.69	Ahe	Triassic sandstone
Dai et al	2013	D57-5	34.1389	97.675	55.23	1.31	Ahe	Triassic sandstone
Dai et al	2013	D44-1	32.3092	96.5583	50.24	1.31	Ahe	Triassic sandstone
Dai et al	2013	D44-2	32.3092	96.5583	72.62	1.37	Ahe	Triassic sandstone
Dai et al	2013	D44-3	32.3092	96.5583	51.2	1.05	Ahe	Triassic sandstone
Dai et al	2013	D44-4	32.3092	96.5583	66.21	1.32	Ahe	Triassic sandstone
Dai et al	2013	D11-1	34.1564	92.3836	51.24	0.98	Ahe	Triassic sandstone
Dai et al	2013	D11-2	34.1564	92.3836	52.26	0.97	Ahe	Triassic sandstone
Dai et al	2013	D11-3	34.1564	92.3836	55	1.38	Ahe	Triassic sandstone
Dai et al	2013	D11-4	34.1564	92.3836	43.78	1.14	Ahe	Triassic sandstone
Dai et al	2013	D36-1	32.31	96.4453	18.54	0.33	Ahe	37Ma trachyandesite
Dai et al	2013	D36-2	32.31	96.4453	15.91	0.3	Ahe	37Ma trachyandesite
Dai et al	2013	D36-3	32.31	96.4453	15.88	0.28	Ahe	37Ma trachyandesite
Dai et al	2013	D36-4	32.31	96.4453	14.02	0.26	Ahe	37Ma trachyandesite
Dai et al	2013	D36-5	32.31	96.4453	19.04	0.36	Ahe	37Ma trachyandesite
Dai et al	2013	D45-1	32.1475	96.5442	20.04	0.36	Ahe	granite
Dai et al	2013	D45-2	32.1475	96.5442	13.81	0.25	Ahe	granite
Dai et al	2013	D45-3	32.1475	96.5442	15.37	0.3	Ahe	granite
Dai et al	2013	D45-4	32.1475	96.5442	17.16	0.38	Ahe	granite
Dai et al	2013	D45-5	32.1475	96.5442	12.95	0.23	Ahe	granite
Dai et al	2013	D03-1	33.0769	97.9653	49.49	1.01	Ahe	215Ma granite
Dai et al	2013	D03-2	33.0769	97.9653	66.01	1.31	Ahe	215Ma granite
Dai et al	2013	D03-3	33.0769	97.9653	39.07	0.9	Ahe	215Ma granite
Dai et al	2013	D03-4	33.0769	97.9653	38.42	0.87	Ahe	215Ma granite
Dai et al	2013	D03-5	33.0769	97.9653	83.88	1.74	Ahe	215Ma granite
Dai et al	2013	D26-1	32.2903	91.5861	91.41	2.03	ZHe	granite
Dai et al	2013	D26-2	32.2903	91.5861	121.38	2.34	ZHe	granite
Dai et al	2013	D26-3	32.2903	91.5861	111.05	2.52	ZHe	granite
Dai et al	2013	D26-4	32.2903	91.5861	106.57	2.48	ZHe	granite
Dai et al	2013	D26-5	32.2903	91.5861	15.95	3.74	ZHe	granite
Dai et al	2013	D27-1	31.9658	92.1678	111.99	3.1	ZHe	129Ma granite
Dai et al	2013	D27-2	31.9658	92.1678	115.98	4.05	ZHe	129Ma granite
Dai et al	2013	D27-3	31.9658	92.1678	117.48	2.77	ZHe	129Ma granite
Dai et al	2013	D27-4	31.9658	92.1678	106.96	2.51	ZHe	129Ma granite
Dai et al	2013	D27-5	31.9658	92.1678	130.58	3.5	ZHe	129Ma granite
Dai et al	2013	D28-1	31.7847	92.0669	88.43	1.93	ZHe	110Ma granite
Dai et al	2013	D28-2	31.7847	92.0669	96.98	2.51	ZHe	110Ma granite
Dai et al	2013	D28-3	31.7847	92.0669	77.9	1.94	ZHe	110Ma granite
Dai et al	2013	D28-4	31.7847	92.0669	84.81	1.91	ZHe	110Ma granite
Dai et al	2013	D28-5	31.7847	92.0669	87.15	2.21	ZHe	110Ma granite
Dai et al	2013	D30-1	31.7378	92.6819	54.7	1	ZHe	112Ma granite
Dai et al	2013	D30-2	31.7378	92.6819	61.3	1.3	ZHe	112Ma granite
Dai et al	2013	D30-3	31.7378	92.6819	57.74	1.2	ZHe	112Ma granite
Dai et al	2013	D30-4	31.7378	92.6819	46.09	0.91	ZHe	112Ma granite
Dai et al	2013	D30-5	31.7378	92.6819	57.32	1.05	ZHe	112Ma granite
Dai et al	2013	D32-1	31.8325	93.5553	76.23	1.54	ZHe	113Ma granite
Dai et al	2013	D32-2	31.8325	93.5553	64.46	1.14	ZHe	113Ma granite
Dai et al	2013	D32-3	31.8325	93.5553	87.56	1.64	ZHe	113Ma granite
Dai et al	2013	D32-4	31.8325	93.5553	72.76	1.72	ZHe	113Ma granite
Dai et al	2013	D32-5	31.8325	93.5553	80	1.59	ZHe	113Ma granite
Dai et al	2013	D56-1	33.7928	96.7975	106.84	2.66	ZHe	211Ma granite
Dai et al	2013	D56-2	33.7928	96.7975	96.43	1.82	ZHe	211Ma granite
Dai et al	2013	D56-3	33.7928	96.7975	107.19	2.65	ZHe	211Ma granite
Dai et al	2013	D56-4	33.7928	96.7975	107.52	2.1	ZHe	211Ma granite
Dai et al	2013	D56-5	33.7928	96.7975	104.82	2.08	ZHe	211Ma granite
Dai et al	2013	D03-1	33.0769	97.9653	139.08	3.56	ZHe	215Ma granite
Dai et al	2013	D03-2	33.0769	97.9653	141.46	3.67	ZHe	215Ma granite
Dai et al	2013	D03-3	33.0769	97.9653	149.34	4.77	ZHe	215Ma granite
Dai et al	2013	D03-4	33.0769	97.9653	149.56	3.59	ZHe	215Ma granite
Dai et al	2013	D03-5	33.0769	97.9653	163.53	5.32	ZHe	215Ma granite
Ren et al	2015	PE33-R	quemocuo		44.4	1.6	AFT	J2 Quemocuo Group
Ren et al	2015	PE65-Z35	quemocuo		36.7	2.4	AFT	J2 Quemocuo Group
Ren et al	2015	PE98-Z43	quemocuo		26	1.7	AFT	J2 Xiali Group
Ren et al	2015	PE149-Z52	quemocuo		56.5	3.7	AFT	J3 Xueshan Group
Ren et al	2015	PB21-R	tumengela		77.8	5.5	AFT	T3 Xiaochaka Group
Ren et al	2015	PB49-R25	tumengela		22.6	2.4	AFT	T3 Xiaochaka Group
Ren et al	2015	PL7-R5	tuotuo river		53.6	9.2	AFT	K1 Abushan Fm.
Ren et al	2015	P0209R2	xiaochakaxi		35	0.2	AFT	T3 Xiaochaka Group
Ren et al	2015	P0214R1	xiaochakaxi		25.7	2.9	AFT	T3 Xiaochaka Group
Ren et al	2015	P0301R1	nadigangri		26.1	11.5	AFT	J2 Quemocuo Group
Ren et al	2015	P04015R1	nadigangri		30.8	1.4	AFT	J2 Quemocuo Group
Ren et al	2015	P04051R1	nadigangri		56	5.4	AFT	J2 Xiali Group
Ren et al	2015	P0529R1	eastern xiaochaka		101.6	2.2	AFT	T3 Xiaochaka Group
Ren et al	2015	Tibet norm-42	qixiangcuo		55.4	1.6	AFT	E3 Shuanghu Group
Ren et al	2015	Tibet norm-113	duogecuoren		84.8	7.3	AFT	J3 Xueshan Group
Ren et al	2015	Tibet norm-126	duogecuoren		88.4	7	AFT	J3 Xueshan Group
Ren et al	2015	Tibet norm-127	duogecuoren		59.9	4.4	AFT	J3 Xueshan Group
Ren et al	2015	G001R1	anduo		87.2	6.3	AFT	MESOZOIC IGNEOUS ROCK
Ren et al	2015	RPI11-CH30	rejuechaka		87.3	3	AFT	K1 Kanglu Group
Ren et al	2015	XP7-Ch4	xianshui river		40.7	1.9	AFT	J2 Quemocuo Group
Ren et al	2015	WJP64B18	eastern wulanwula lake		43.5	2.1	AFT	J3 Suowa Group
Ren et al	2015	ZP12B7	north slope of zuerkenwula mountain		23.2	6.8	AFT	J2 Quemocuo Group
Ren et al	2015	WKP9B8	eastern wulanwula lake		60.1	9.1	AFT	K1 Abushan Group
Ren et al	2015	JP04-(25)cH9	juhua mountain		108.7	2.5	AFT	J1 Quse Group
Ren et al	2015	JP04-(41)S1	juhua mountain		132.1	17.8	AFT	J1 Quse Group
Ren et al	2015	BP07-9CH7	bailongbing river		121.1	40.5	AFT	J2 Xiali Group
Ren et al	2015	GP13-(2)CH1	north slope of guoganjianian mountain		69.8	4.2	AFT	P2 Rejuechaka Group
Ren et al	2015	GP13-(5)CH1	north slope of guoganjianian mountain		124.9	12.3	AFT	P3 Rejuechaka Group
Ren et al	2015	LP01-06CH3	laxiongcuo		78.3	3.2	AFT	J2 Xiali Group
Ren et al	2015	JBP20CH2	north slope of jiantou mountain		117	9.9	AFT	J3 Xueshan Group
Ren et al	2015	CH-162	yicangma		10.3	1.2	AFT	J2 Quemocuo Group
Ren et al	2015	CH-242	yicangma		49.3	4.3	AFT	J2 Buqu Group
Ren et al	2015	CH-272	yicangma		99	22.3	AFT	J3 Xueshan Group
Wang et al	2007	NT-6	30.9521	91.9802	33.1	3.9	AFT	granite
Wang et al	2007	NT-7	31.8972	91.7377	43.8	4.7	AFT	schist
Wang et al	2007	NT-9	32.0037	91.709	109.2	9.9	AFT	schist
Wang et al	2007	NT-10	32.1776	91.6794	40.1	5.3	AFT	granite
Wang et al	2007	NT-12	33.0684	92.0383	149.4	13	AFT	granite
Roherman et al	2012	AR1	33.25	85.19	19.1	0.3	AHe	granite 153Ma
Roherman et al	2012	AR3	33.76	84.56	44.5	2.2	AHe	granite
Roherman et al	2012	AR4	33.87	84.12	37	0.7	AHe	granite 139Ma
Roherman et al	2012	AR5	32.78	84.02	48.8	0.7	AHe	granite
Roherman et al	2012	AR6	32.71	84.24	51.6	2	AHe	granite
Roherman et al	2012	GT1	33.25	85.19	45.2	1	AHe	granite 200Ma
Roherman et al	2012	PK5	31.5	89.08	49.9	0.7	AHe	granite 112Ma
Roherman et al	2012	PK6	33.3	85.17	27.6	0.4	AHe	granite 474Ma
Roherman et al	2012	PK3	31.41	89.02	54.6	1.3	AHe	granite 112Ma
Roherman et al	2012	PK3A	32.12	91.71	54.4	0.6	AHe	Orthogneiss 852Ma
Roherman et al	2012	PU1	33.25	92.01	43	0.5	AHe	Granitoid 69.2Ma
Roherman et al	2012	JV4	31.36	89.89	52	0.7	AHe	granite 170.7Ma
Roherman et al	2012	JV1	31.34	89.88	44.8	0.6	AHe	granite 125Ma
Roherman et al	2012	JV3	31.5	84.5	44.7	1.1	AHe	granite 79Ma
Roherman et al	2012	JV4	31.36	89.89	53.7	2.6	AFT	granite 170.7Ma
Roherman et al	2012	PK1A	31.88	91.7	72.9	3	AFT	Orthogneiss 178.8Ma
Roherman et al	2012	PK1B	31.87	91.7	72.7	4.4	AFT	Orthogneiss
Roherman et al	2012	PK2	32.03	91.71	74.4	3	AFT	Orthogneiss
Roherman et al	2012	PK3A	32.12	91.71	71.9	3.1	AFT	Orthogneiss 852Ma
Roherman et al	2012	PU1	33.25	92.01	53.6	2.1	AFT	Granitoid 69.2Ma
Roherman et al	2012	JV1	31.34	89.88	61.7	2.9	AFT	granite 125Ma
Song et al	2014	Q1	34.9333	87.8333	142	12	ZFT	Late Triassic sandstone
Song et al	2014	Q2	34.9167	87.8	159	15	ZFT	Late Triassic sandstone
Song et al	2014	Q3	34.8	87.5333	199	18	ZFT	Late Triassic sandstone
Song et al	2014	Q4	34.7833	87.55	164	14	ZFT	Late Triassic sandstone
Song et al	2014	Q5	33.7333	87.6667	142	11	ZFT	Late Triassic sandstone
Song et al	2014	Q6	33.7167	87.7333	181	15	ZFT	Late Triassic sandstone
Song et al	2014	Q7	33.4333	87.5167	168	13	ZFT	Late Triassic sandstone
Song et al	2014	Q8	33.0167	87.6833	92	10	ZFT	Late Triassic sandstone
Song et al	2014	Q9	33.0167	87.8667	108	8	ZFT	Late Triassic sandstone
Song et al	2014	Q10	33.6833	91.85	104	7	ZFT	Late Triassic sandstone
Song et al	2014	Q11	33.7333	91.75	102	7	ZFT	Late Triassic sandstone
Song et al	2014	Q12	33.7167	91.3167	68	7	ZFT	Late Triassic sandstone
Song et al	2014	Q13	33.7833	91.1333	54	8	ZFT	Late Triassic sandstone
Song et al	2014	Q14	33.8	91.25	128	12	ZFT	Late Triassic sandstone
Zhao et al	2018	1407-1	33.2251	86.6215	57	3	AHe
Zhao et al	2018	1411-1	33.2372	86.3444	94	5	AHe
Zhao et al	2018	1412-1	33.2019	86.2644	60	3	AHe
Zhao et al	2018	1413-1	33.1497	86.2441	81	4	AHe
Zhao et al	2018	1430-1	33.1086	86.3413	70	4	AHe
Zhao et al	2018	1431-1	33.0534	86.5371	65	3	AHe
Zhao et al	2018	1437-2	33.4585	87.4339	82	5	AHe
Zhao et al	2018	1455-1	33.4712	87.5692	60	3	AHe
Zhao et al	2018	1456-1	33.4367	87.6883	67	5	AHe
Zhao et al	2018	1457-1	33.3092	87.845	74	4	AHe
Zhao et al	2018	1458-2	33.2502	88.0099	83	5	AHe
Zhao et al	2018	1461-1	33.28	88.1014	70	4	AHe
Zhao et al	2018	1462-1	33.32	88.1376	71	4	AHe
Zhao et al	2018	1463-1	33.3406	88.147	70	4	AHe
Zhao et al	2018	1465-1	33.3165	88.5317	86	5	AHe
Zhao et al	2018	1466-1	33.3256	88.4574	82	4	AHe
Zhao et al	2018	1468-1	33.322	88.3475	72	4	AHe
Zhao et al	2018	1411-1	33.2372	86.3444	170	9	ZFT
Zhao et al	2018	1412-1	33.2019	86.2644	103	7	ZFT
Zhao et al	2018	1413-1	33.1497	86.2441	119	10	ZFT
Zhao et al	2018	1437-2	33.4585	87.4339	113	5	ZFT
Zhao et al	2018	1455-1	33.4712	87.5692	121	5	ZFT
Zhao et al	2018	1456-1	33.4367	87.6883	142	6	ZFT
Zhao et al	2018	1457-1	33.3092	87.845	120	5	ZFT
Zhao et al	2018	1458-2	33.2502	88.0099	131	7	ZFT
Zhao et al	2018	1461-1	33.28	88.1014	113	6	ZFT
Zhao et al	2018	1462-1	33.32	88.1376	133	9	ZFT
Zhao et al	2018	1463-1	33.3406	88.147	117	6	ZFT
Zhao et al	2018	1465-1	33.3165	88.5317	129	8	ZFT
Zhao et al	2018	1466-1	33.3256	88.4574	132	7	ZFT
Zhao et al	2018	1468-1	33.322	88.3475	132	7	ZFT
Zhu et al	2018	QZ03	32.1874	91.6998	182	9	ZFT	Jurassic granite
Zhu et al	2018	QZ04	32.1239	91.7129	181	9	ZFT	Jurassic granite
Zhu et al	2018	QZ03	32.1874	91.6998	70.4	4.8	AFT	Jurassic granite
Zhang et al	2019	D0609	32.6186	89.1368	113.6	5.4	AFT	J2x sandstone
Zhang et al	2019	D0815	32.5279	89.2868	65.4	6.3	AFT	J2x sandstone
Zhang et al	2019	ED0616	32.7861	90.6385	90.7	6.8	AFT	J2x sandstone
Zhang et al	2019	ED0620	32.9507	90.6006	55	2.5	AFT	T3d sandstone
Zhang et al	2019	EP1502	32.9088	90.8179	55.6	3.7	AFT	J2x sandstone
Zhang et al	2019	EP1503	32.8911	90.8323	44.6	2.3	AFT	J2b sandstone
Zhang et al	2019	EP1504-09	32.7339	90.6197	49.1	2	AFT	K2a sandstone
Zhang et al	2019	EP1504-17	32.7319	90.6186	62.5	4.2	AFT	K2a sandstone
Zhang et al	2019	EP1505	32.9701	90.7424	53.7	2.4	AFT	T3d sandstone
Zhang et al	2019	EP1506	32.7286	91.0697	84.1	4	AFT	T3d sandstone
Zhang et al	2019	PQ1503	33.3581	88.6978	40.1	2.6	AFT	J2q sandstone
Zhang et al	2019	PQ1506	32.767	88.898	120.9	5.5	AFT	J2x sandstone
Zhao et al	2017	0825-RZ1	33.4561	86.5989	147.985	2.20887	ZHe	quartzite basement 520-490Ma
Zhao et al	2017	0819-RZ1	33.2136	86.6172	149.666	5.6384	ZHe	granite 210Ma
Zhao et al	2017	0819-RZ2	33.2189	86.6164	176.781	14.575	ZHe	granite 210Ma
Zhao et al	2017	0819-RZ3	33.2258	86.62	132.723	5.12885	ZHe	granite 210Ma
Zhao et al	2017	0819-RZ4	33.1875	86.6353	141.047	9.33719	ZHe	granite 210Ma
Zhao et al	2017	0819-RZ5	33.1092	86.6772	192.263	6.66957	ZHe	(blueschist m elange) mélange >210Ma
Zhao et al	2017	0819-RZ7	33.0544	86.6892	198.911	16.8035	ZHe	(greenschist m elange)mélange >210Ma
Zhao et al	2017	0729-RZ1	32.9439	86.9106	156.538		ZHe	red bed sandstone <90Ma
McRivette	2019	S21	36.327	95.306	112.1	6.8	ZFT	granite
McRivette	2019	S22	36.173	94.774	176.2	11.4	ZFT	biotite granite
McRivette	2019	S23	36.136	94.266	175.6	11.2	ZFT	granodiorite
McRivette	2019	S24	36.194	94.252	188.3	10.1	ZFT	biotite granite
McRivette	2019	S25	36.218	94.215	139.3	10.4	ZFT	biotite granite
McRivette	2019	S26	35.739	94.26	95.6	5.8	ZFT	mylonitic granite
McRivette	2019	S72	36.106	95.221	144.3	10.1	ZFT	biotite granite
McRivette	2019	S73	35.757	95.224	101.9	8.1	ZFT	granodiorite
McRivette	2019	S75	36.17	95.244	156.9	10.4	ZFT	biotite granite
McRivette	2019	S76	36.006	94.431	106.5	5.4	ZFT	granite
McRivette	2019	S21	36.327	95.306	52.9	3.4	AFT	granite
McRivette	2019	S22	36.173	94.774	11.9	2.5	AFT	biotite granite
McRivette	2019	S24	36.194	94.252	14.1	1.4	AFT	biotite granite
McRivette	2019	S25	36.218	94.215	16.3	1.7	AFT	biotite granite
McRivette	2019	S26	35.739	94.26	0.9	0.3	AFT	mylonitic granite
McRivette	2019	S73	35.757	95.224	10	1.8	AFT	granodiorite
McRivette	2019	S74	35.857	94.238	2.4	0.6	AFT	biotite granite
McRivette	2019	S75	36.17	95.244	5.1	1.4	AFT	biotite granite
McRivette	2019	S76	36.006	94.431	3.7	0.8	AFT	granite
Song et al	2018	C1	33.26	88.68	116	8	AFT	permian basalt
Song et al	2018	C2	33.26	88.66	118	7	AFT	basement
Song et al	2018	C3	33.29	88.6	66	10	AFT	basement
Song et al	2018	C4	33.31	88.56	57	5	AFT	basement
Song et al	2018	C5	33.33	88.56	66	6	AFT	T3 granite
Song et al	2018	C6	33.56	88.5	86	6	AFT	T3 granite
Song et al	2018	C7	33.29	88.42	84	6	AFT	T3 granite
Song et al	2018	C8	33.32	88.41	92	6	AFT	T3 granite
Song et al	2018	C9	33.28	88.37	78	6	AFT	T3 granite
Song et al	2018	C10	33.24	88.36	67	5	AFT	basement
Song et al	2018	C11	33.23	88.34	87	8	AFT	permian basalt
Song et al	2018	C12	33.19	88.22	83	7	AFT	basement
Song et al	2018	C13	33.2	88.16	72	6	AFT	permian basalt
Song et al	2018	C14	33.29	88.77	80	7	AFT	T3 granite
Song et al	2018	C15	33.39	87.38	87	7	AFT	permian basalt
Haider	2013	DC23	30.9944	90.9415	85.7	5.7	ZHe	120 Ma Granite
Haider	2013	DC31	31.4677	89.9208	85.1	4.7	ZHe	120 Ma Granite
Haider	2013	DC33	31.3733	90.0143	69.2	4.4	ZHe	120 Ma Granite
Haider	2013	DC41	30.9366	90.9395	89.5	7.6	ZHe	120 Ma Granite
Haider	2013	H7	31.2753	90.082	67.7	2.1	ZHe	120 Ma Granite
Haider	2013	H13	31.3293	90.0153	84.4	6.9	ZHe	120 Ma Granite
Haider	2013	H16	31.4844	89.9504	91	8	ZHe	120 Ma Granite
Haider	2013	H23	31.4227	89.8048	77.1	7.9	ZHe	120 Ma Granite
Haider	2013	H24	31.4434	89.8054	80.2	5	ZHe	120 Ma Granite
Haider	2013	H29	31.4433	89.8982	75.1	6.6	ZHe	120 Ma Granite
Haider	2013	H30	31.4685	89.8959	85.1	9.9	ZHe	120 Ma Granite
Haider	2013	H31	31.4797	89.9194	66.7	3.2	ZHe	120 Ma Granite
Haider	2013	H33	31.2879	90.151	76.8	6.5	ZHe	120 Ma Granite
Haider	2013	H34	31.2944	90.1428	73.3	6.8	ZHe	120 Ma Granite
Haider	2013	H35	31.309	90.1469	69.3	4.8	ZHe	120 Ma Granite
Haider	2013	H72	31.143	90.5319	77.5	4.4	ZHe	120 Ma Granite
Haider	2013	H87	31.1861	90.3544	69.1	3.9	ZHe	120 Ma Granite
Haider	2013	H19	31.2078	89.7781	61.8	2.8	ZHe	120 Ma Granite
Haider	2013	H20	31.2208	89.7804	72.3	5.8	ZHe	120 Ma Granite
Haider	2013	DC29	31.2889	89.5034	78.1	8.3	ZHe	120 Ma Granite
Haider	2013	DC26B	31.3668	90.8914	72.8	3.2	AFT	120 Ma Granite
Haider	2013	DC28	31.3746	90.172	58.8	2.9	AFT	120 Ma Granite
Haider	2013	DC31	31.4677	89.9208	58.8	3	AFT	120 Ma Granite
Haider	2013	DC33	31.3733	90.0143	59.6	2.4	AFT	120 Ma Granite
Haider	2013	DC40	30.9579	90.8623	71.7	4	AFT	120 Ma Granite
Haider	2013	DC41	30.9366	90.9395	88.5	5.5	AFT	120 Ma Granite
Haider	2013	H7	31.2753	90.082	61.7	4.4	AFT	120 Ma Granite
Haider	2013	H12	31.3281	90.1504	54.6	2.4	AFT	120 Ma Granite
Haider	2013	H16	31.4844	89.9504	52.2	2.1	AFT	120 Ma Granite
Haider	2013	H23	31.4227	89.8048	59.4	2.3	AFT	120 Ma Granite
Haider	2013	H24	31.4434	89.8054	58.5	3.3	AFT	120 Ma Granite
Haider	2013	H29	31.4433	89.8982	56.8	2.8	AFT	120 Ma Granite
Haider	2013	H30	31.4685	89.8959	58.2	3	AFT	120 Ma Granite
Haider	2013	H31	31.4797	89.9194	68.4	3.9	AFT	120 Ma Granite
Haider	2013	H33	31.2879	90.151	60.1	3.3	AFT	120 Ma Granite
Haider	2013	H34	31.2944	90.1428	66.9	3.6	AFT	120 Ma Granite
Haider	2013	H45	31.151	90.6566	57.3	2.8	AFT	120 Ma Granite
Haider	2013	H49	31.0037	90.7381	45	3.6	AFT	120 Ma Granite
Haider	2013	H70	31.0527	99.5591	58.2	3.2	AFT	120 Ma Granite
Haider	2013	H71B	31.1702	90.5139	72	4.3	AFT	120 Ma Granite
Haider	2013	H72	31.143	90.5319	57.5	4.2	AFT	120 Ma Granite
Haider	2013	H85	31.297	90.3332	61.3	3	AFT	120 Ma Granite
Haider	2013	H86	31.2613	90.3545	53.3	3.4	AFT	120 Ma Granite
Haider	2013	H90	31.1817	90.6772	61	3.7	AFT	120 Ma Granite
Haider	2013	H105	31.2885	90.1044	45.8	2.4	AFT	120 Ma Granite
Haider	2013	H19	31.2078	89.7781	65	4.2	AFT	120 Ma Granite
Haider	2013	H20	31.2208	89.7804	68.4	4.3	AFT	120 Ma Granite
Haider	2013	H21	31.2419	89.7747	76.6	4.9	AFT	120 Ma Granite
Haider	2013	H4	30.878	91.222	64.1	3.9	AFT	120 Ma Granite
Haider	2013	DC23	30.9944	90.9415	34.8	1.1	AHe	120 Ma Granite
Haider	2013	DC25	31.1641	90.6762	47.3	1.8	AHe	120 Ma Granite
Haider	2013	DC28	31.3746	90.172	45.5	2.1	AHe	120 Ma Granite
Haider	2013	DC31	31.4677	89.9208	55.1	3.3	AHe	120 Ma Granite
Haider	2013	DC33	31.3733	90.0143	52	0.2	AHe	120 Ma Granite
Haider	2013	DC40	30.9579	90.8623	38.8	5.2	AHe	120 Ma Granite
Haider	2013	DC41	30.9366	90.9395	50	2.9	AHe	120 Ma Granite
Haider	2013	H7	31.2753	90.082	47	4.7	AHe	120 Ma Granite
Haider	2013	H12	31.3281	90.1504	55.1	1.9	AHe	120 Ma Granite
Haider	2013	H13	31.3293	90.0153	43.3	1.2	AHe	120 Ma Granite
Haider	2013	H14	31.3136	90.1761	50.2	4.3	AHe	120 Ma Granite
Haider	2013	H23	31.4227	89.8048	56.2	0.9	AHe	120 Ma Granite
Haider	2013	H24	31.4434	89.8054	56.3	0.7	AHe	120 Ma Granite
Haider	2013	H29	31.4433	89.8982	53.6	1.2	AHe	120 Ma Granite
Haider	2013	H30	31.4685	89.8959	59	3.6	AHe	120 Ma Granite
Haider	2013	H31	31.4797	89.9194	55.4	5.7	AHe	120 Ma Granite
Haider	2013	H33	31.2879	90.151	45.4	1.5	AHe	120 Ma Granite
Haider	2013	H34	31.2944	90.1428	42.4	1.2	AHe	120 Ma Granite
Haider	2013	H35	31.309	90.1469	54.1	2.3	AHe	120 Ma Granite
Haider	2013	H45	31.151	90.6566	46.4	2.6	AHe	120 Ma Granite
Haider	2013	H50	31.1043	90.7746	57.7	5.6	AHe	120 Ma Granite
Haider	2013	H51	31.0367	90.7063	67.2	15.9	AHe	120 Ma Granite
Haider	2013	H70	31.0527	99.5591	48.9	1.4	AHe	120 Ma Granite
Haider	2013	H71B	31.1702	90.5139	48.2	2.6	AHe	120 Ma Granite
Haider	2013	H72	31.143	90.5319	43.8	0.3	AHe	120 Ma Granite
Haider	2013	H85	31.297	90.3332	58.4	11.9	AHe	120 Ma Granite
Haider	2013	H86	31.2613	90.3545	54.9	0.7	AHe	120 Ma Granite
Haider	2013	H87	31.1861	90.3544	53	1.8	AHe	120 Ma Granite
Haider	2013	H90	31.1817	90.6772	44.9	3.1	AHe	120 Ma Granite
Haider	2013	H105	31.2885	90.1044	49.5	1.2	AHe	120 Ma Granite
Haider	2013	H19	31.2078	89.7781	49	4.7	AHe	120 Ma Granite
Haider	2013	H20	31.2208	89.7804	61.2	5.3	AHe	120 Ma Granite
Haider	2013	H21	31.2419	89.7747	46.8	4.4	AHe	120 Ma Granite
Haider	2013	H22B	31.2734	89.8383	54.2	3.7	AHe	120 Ma Granite
Haider	2013	DC29	31.2889	89.5034	39.5	1.3	AHe	120 Ma Granite
Haider	2013	DC38	30.9527	90.7118	40	1.1	AHe	120 Ma Granite
Haider	2013	H47	31.0002	90.7132	55.7	17.5	AHe	120 Ma Granite
Hetzel	2011	H23	31.4227	89.8048	77.1	7.9	ZHe	granodiorite 117Ma
Hetzel	2011	H24	31.4434	89.8054	80.2	5	ZHe	granodiorite
Hetzel	2011	H29	31.4433	89.8982	75.1	6.6	ZHe	biotite granite 111.7Ma
Hetzel	2011	H30	31.4685	89.8959	94.1	9.1	ZHe	leucogranite 112.8Ma
Hetzel	2011	H31	31.4797	89.9194	66.7	3.2	ZHe	leucogranite
Hetzel	2011	DC31	31.4677	89.9208	85.1	4.7	ZHe	biotite granite 117.5Ma
Hetzel	2011	DC33	31.3733	90.0143	74.8	1.7	ZHe	granodiorite 111.6Ma
Hetzel	2011	H23	31.4227	89.8048	59.4	2.3	AFT	granodiorite 117Ma
Hetzel	2011	H24	31.4434	89.8054	58.5	3.3	AFT	granodiorite
Hetzel	2011	H29	31.4433	89.8982	56.8	2.8	AFT	biotite granite 111.7Ma
Hetzel	2011	H30	31.4685	89.8959	58.2	3	AFT	leucogranite 112.8Ma
Hetzel	2011	H31	31.4797	89.9194	68.4	3.9	AFT	leucogranite
Hetzel	2011	DC31	31.4677	89.9208	58.8	3	AFT	biotite granite 117.5Ma
Hetzel	2011	DC33	31.3733	90.0143	59.6	2.4	AFT	granodiorite 111.6Ma
Hetzel	2011	H23	31.4227	89.8048	56.2	0.9	AHe	granodiorite 117Ma
Hetzel	2011	H24	31.4434	89.8054	56.3	0.7	AHe	granodiorite
Hetzel	2011	H29	31.4433	89.8982	53.6	1.2	AHe	biotite granite 111.7Ma
Hetzel	2011	H30	31.4685	89.8959	59	3.6	AHe	leucogranite 112.8Ma
Hetzel	2011	H31	31.4797	89.9194	55.4	5.7	AHe	leucogranite
Hetzel	2011	DC31	31.4677	89.9208	55.1	3.3	AHe	biotite granite 117.5Ma
Hetzel	2011	DC33	31.3733	90.0143	52	0.2	AHe	granodiorite 111.6Ma
Staisch	2016	11UMT16	34.525	92.729	25.8	4	AHe	Early Cenozoic sandstone
Staisch	2016	11UMT22	34.708	92.894	28.2	1.5	AHe	Early Cenozoic sandstone
Staisch	2016	11UMT16	34.525	92.729	41.9	9.7	AFT	Early Cenozoic sandstone
Staisch	2016		34.525	92.729	31	9.8	AFT	Early Cenozoic sandstone
Staisch	2016	11UMT22	34.708	92.894	30.4	11.4	AFT	Early Cenozoic sandstone
Staisch	2016		34.708	92.894	29.2	9.3	AFT	Early Cenozoic sandstone
Wang et al	2008	TGL-Ft-1	33.009	91.973	47.3	4	AFT
Wang et al	2008	YSP-Ft-1	33.603	92.078	37.7	3	AFT
Wang et al	2008	TFt-1	34.372	92.508	48.9	5.3	AFT
Wang et al	2008	FFt-1	34.693	92.907	51.2	12.8	AFT
Wang et al	2008	FFt-2	34.675	92.92	115	12.2	AFT
Wang et al	2008	EFt-1	34.613	92.759	32.9	4.8	AFT
Wang et al	2008	WLFt-y3	34.597	90.174	52.6	4.5	AFT
Wang et al	2008	WLFt-y2	34.598	90.175	56.5	11.3	AFT
Wang et al	2008	WLFt-y0	34.6	90.173	44.2	4.7	AFT
Wang et al	2008	FP04-9-Ft	34.525	92.726	43.6	4.3	AFT
Wang et al	2008	KL-2	35.55	93.97	72.7	9.8	AFT
Wang et al	2008	KL-4	35.55	93.97	70.3	7.3	AFT
Wang et al	2008	KL-1	35.55	93.97	61.5	12.4	AFT
Wang et al	2008	P0126HX	33.607	92.067	38.2	4	AFT
Wang et al	2008	P0158HX	33.6	92.067	47.3	4.3	AFT
Wang et al	2008	P0171HX	33.58	92.067	39.4	5.5	AFT
Wang et al	2008	P01(96)B1	33.6	92.067	82	18.7	AFT
Wang et al	2008	P172FT5	33.45	92.35	65.2	9.9	AFT
Wang et al	2008	P172FT2	33.45	92.35	55.8	5.4	AFT
Wang et al	2008	P171FT1	33.45	92.35	55.5	7.5	AFT
Wang et al	2008	P1407B1	34.978	90.022	93.1	25.5	AFT
Wang et al	2008	SP17-(01)B1	34.52	92.9	47.2	5.9	AFT
Wang et al	2008	P03-11B2	34.63	91.12	46.7	2.7	AFT
Wang et al	2008	P14-51	34.978	90.022	40	5.5	AFT
Wang et al	2008	SQ16	34.574	92.912	39.4	4.2	AFT
Wang et al	2008	P14-52	34.978	90.022	39.1	4.6	AFT
Wang et al	2008	SP19-1	34.56	92.905	37.4	4.5	AFT
Wang et al	2008	SQ22	34.574	92.912	36.2	4.3	AFT
Wang et al	2008	KP01-(21)C2	35.429	90.785	28.6	2.8	AFT
Wang et al	2008	P03-15B	34.63	91.12	22.9	3.4	AFT
Zhao et al	2020	080107-RZ1	32.47	86.58	141	9	ZHe	J2s sandstone
Zhao et al	2021	080202-RZ1	32.63	86.53	124	33	ZHe	T3r siltstone
Zhao et al	2022	080302-RZ1	32.45	86.63	100	7	ZHe	J1-2s siltstone
Zhao et al	2023	080305-RZ1	32.45	86.63	97	21	ZHe	J1-2s sandstone
Zhao et al	2024	080406-RZ1	32.28	86.71	106	22	ZHe	J1-2s sandstone
Zhao et al	2025	080602-RZ1	32.26	86.93	107	5	ZHe	T3w sandstone
Zhao et al	2026	080603-RZ1	32.27	86.93	109	3	ZHe	T3w volcano
Zhao et al	2027	081001-RZ1	32.36	87.14	87	5	ZHe	K1 granite
Zhao et al	2028	081007-RZ1	32.28	87.07	97	12	ZHe	T3w sandstone
Zhao et al	2029	080406-RZ1	32.28	86.71	58	6	AHe	J1-2s sandstone
Zhao et al	2030	080602-RZ1	32.26	86.93	83	10	AHe	T3w sandstone
Zhao et al	2031	081001-RZ1	32.36	87.14	85	6	AHe	K1 granite
Zhao et al	2032	080603-RZ1	32.27	86.93	51	4	AHe	T3w volcano
Zhao et al	2033	080107-RZ1	32.47	86.58	98	6	AHe	J2s sandstone
Zhao et al	2034	081001-RZ1	32.36	87.14	86	5.1	AFT	K1 granite
Zhao et al	2035	080406-RZ1	32.28	86.71	70.3	3.3	AFT	J1-2s sandstone
Zhao et al	2036	080602-RZ1	32.26	86.93	80.8	4.5	AFT	T3w sandstone
Jolivet	2001	WQ122	38.45	94.775	20.7	2.3	AFT
Jolivet	2001	AT131	37.63	91.363	17.6	1.5	AFT
Jolivet	2001	AT118	36.06	90.225	17.3	1.8	AFT
Jolivet	2001	AT113	36.7	89.263	19.3	1.8	AFT
Jolivet	2001	AT103	36.99	88.813	52.8	7.2	AFT
Jolivet	2003	AT113	36.7	89.263	96.4	3.8	ZFT
Jolivet	2003	AT118	36.06	90.225	160.6	14.4	ZFT
Wang et al	2017	13312-2	36.8814	91.6863	39.3	3	AHe	intrusion
Wang et al	2017	13312-3	36.902	91.674	37.2	3.5	AHe	intrusion
Wang et al	2017	13312-4	36.9102	91.6714	36.6	3.2	AHe	intrusion
Wang et al	2017	13312-5	36.921	91.6704	39.8	3	AHe	intrusion
Wang et al	2017	1335-1	36.865	90.3216	43.1	4.5	AHe	234.4Ma
Wang et al	2017	1335-3	36.8661	90.3146	43.2	4.5	AHe	234.5Ma
Wang et al	2017	1335-4	36.9092	90.2596	43.4	4.4	AHe	234.6Ma
Shi et al	2018	QM-1	37.27	85.5149	22.5	3.3	ZHe	early Mesozoic granite pluton
Shi et al	2018	QM-2	37.27	85.5114	21.8	9.3	ZHe	early Mesozoic granite pluton
Shi et al	2018	QM-4	37.269	85.5098	15.5	1.9	ZHe	early Mesozoic granite pluton
Shi et al	2018	QM-5	37.269	85.5069	13.4	2.3	ZHe	early Mesozoic granite pluton
Shi et al	2018	QM-6	37.273	85.4971	11.8	3.2	ZHe	early Mesozoic granite pluton
Shi et al	2018	QM-1	37.27	85.5149	5.4	0.2	AHe	early Mesozoic granite pluton
Shi et al	2018	QM-2	37.27	85.5114	6.4	1.4	AHe	early Mesozoic granite pluton
Shi et al	2018	QM-3	37.27	85.5098	7.3	1.7	AHe	early Mesozoic granite pluton
Shi et al	2018	QM-4	37.269	85.5098	6.8	0.3	AHe	early Mesozoic granite pluton
Shi et al	2018	QM-7	37.284	85.4918	6.4	0.4	AHe	early Mesozoic granite pluton
Shi et al	2018	15RQ01	38.676	88.1954	224.8	38.3	ZHe	grantite 478±6.7 Ma
Shi et al	2018	15RQ02	38.675	88.1946	194.2	24.5	ZHe	grantite 478±6.7 Ma
Shi et al	2018	15RQ07	38.684	88.1266	228.8	21.3	ZHe	grantite 478±6.7 Ma
Shi et al	2018	15RQ08	38.728	88.1913	158.4	11.3	ZHe	grantite 478±6.7 Ma
Shi et al	2018	15RQ01	38.676	88.1954	88.3	16.4	AHe	grantite 478±6.7 Ma
Shi et al	2018	15RQ02	38.675	88.1946	102.7	16.9	AHe	grantite 478±6.7 Ma
Shi et al	2018	15RQ03	38.671	88.1882	36.8	13.5	AHe	grantite 478±6.7 Ma
Shi et al	2018	15RQ05	38.67	88.1681	75.7	7.2	AHe	grantite 478±6.7 Ma
Shi et al	2018	15RQ07	38.684	88.1266	111.9	12	AHe	grantite 478±6.7 Ma
Shi et al	2018	15RQ08	38.728	88.1913	32.3	8.9	AHe	grantite 478±6.7 Ma
This paper		G-1	33.3421	88.4067	64.2	4	AHe
This paper		G-3	33.34	88.4064	57.25	3.6	AHe
This paper		G-5	33.3381	88.4033	50.65	3.2	AHe
This paper		G-7	33.3211	88.428	71	5.2	AHe
This paper		G-11	33.2635	88.3706	59.5	3.7	AHe
This paper		G-13	33.266	88.1463	76.6	4.7	AHe
This paper		R-1	33.1858	86.617	115.85	7.2	AHe
This paper		R-3	33.1911	86.619	134.05	8.3	AHe
This paper		R-5	33.1911	86.6233	85.6	10.6	AHe
This paper		R-7	33.1914	86.6275	89.05	5.5	AHe
This paper		R-10	33.1786	86.642	166.76	10.3	AHe
This paper		RGL-1	33.2018	86.3806	39.8	2.5	AHe
This paper		CBG-1	33.7231	83.678	65.6	4.1	AHe
This paper		CBG-5	33.729	83.6676	63	3.9	AHe
This paper		CBG-7	33.717	83.6668	57.3	3.6	AHe
This paper		CBG-9	33.7402	83.6693	44.3	2.8	AHe
This paper		CBG-13	33.6896	83.8048	36.8	2.3	AHe
This paper		G-1	33.3421	88.4067	101.7	3.7	AFT
This paper		G-3	33.34	88.4064	108.7	3.6	AFT
This paper		G-5	33.3381	88.4033	126.7	3.8	AFT
This paper		G-7	33.3211	88.428	123.4	3.5	AFT
This paper		G-11	33.2635	88.3706	114.8	3.3	AFT
This paper		G-13	33.266	88.1463	115	3.9	AFT
This paper		R-1	33.1858	86.617	106.3	3.8	AFT
This paper		R-3	33.1911	86.619	116.5	3.7	AFT
This paper		R-5	33.1911	86.6233	88.2	2.8	AFT
This paper		R-7	33.1914	86.6275	74.8	2.4	AFT
This paper		R-10	33.1786	86.642	105.9	3.2	AFT
This paper		RGL-1	33.2018	86.3806	75.1	1.8	AFT
This paper		RGL-2	33.1969	86.3707	42.6	9.7	AFT
This paper		CBG-1	33.7231	83.678	126.1	3.5	AFT
This paper		CBG-5	33.729	83.6676	98.4	4.2	AFT
This paper		CBG-9	33.7402	83.6693	130.2	3.7	AFT
